# Supplementary material for: Relationship between MUTYH, OGG1 and BRCA1 mutations and mRNA expression in breast and ovarian cancer predisposition
Source: PubMed Central journal article supplement — Mol Clin Oncol. 2020 Nov 26;14(1):15. doi: 10.3892/mco.2020.2177 (PMC7725208; doi:10.3892/mco.2020.2177), 2020-11-26
Supplement: Supplementary_Data.pdf [file Supplementary_Data.pdf]

Table SI. Primers used for the OGG1 gene.

| Exons | Forward (5'-3')      | Reverse (5'-3')        | Product size (bp) |
|-------|----------------------|------------------------|-------------------|
| 1     | TCTTTGGGCGTCGACGAGG  | GAGGGGACAGGCTTCTCAG    | 238               |
| 2     | ATTGAGTGCCAGGGTTGTCA | CTGAGTCATAGAGAAGTGACT  | 348               |
| 3     | CCCAACAGCAGGTACCTCT  | TTGAAAGCTGATGGAAGGCC   | 272               |
| 4     | GGAGAACTTGAAGATGCCT  | GCTCATTTCTGCTCTCCT     | 296               |
| 5-6   | TCTTCCACAAGGGCTCATTC | AAACCTAGGGAGGACACCTA   | 410               |
| 7     | ACCTCCCAACACTGTCATA  | CCCTCCCAACATGAGAC      | 264               |
| 8     | AAAGGCTGTGGCCCACGCA  | AAGATGATCGCCATTAGCTCCA | 453               |

Table SII. BRCA1 Germline rare variants (MAF &lt;5%) carried by 14 out of the 59 patients with BC/OC.

| Patient code | Age range at diagnosis (years) | Type of tumor | Vertical BC/OC transmission | Family history: Cancer site | Nucleotide change(s) | Effect     | SNP        | Expected clinical significance <sup>a</sup> | Word population MAF <sup>b</sup> |
|--------------|--------------------------------|---------------|-----------------------------|-----------------------------|----------------------|------------|------------|---------------------------------------------|----------------------------------|
| B43          | 45-50                          | BC            | Yes                         | -                           | c.1067 A>G           | Gln356Arg  | rs1799950  | N                                           | 0.02                             |
| B64          | 35-40                          | BC            | Yes                         | -                           | c.1067 A>G           | Gln356Arg  | rs1799950  | N                                           | 0.02                             |
| B72          | 45-50                          | BC            | Yes                         | PC                          | c.4039 A>G           | Arg1347Gly | rs28897689 | N                                           | 0.01                             |
| B73          | 40-45                          | BC            | Yes                         | -                           | c.3119 G>A           | Ser1040Asn | rs4986852  | N                                           | 0.01                             |
| B74#1        | 40-45                          | OC            | Yes                         | -                           | Del.<br>Ex 1A/1B-2   | Δ 1-2      | -          | D                                           | -                                |
| B76          | 35-40                          | BC            | Yes                         | -                           | c.2566 T>C           | Tyr856His  | rs80356892 | N                                           | >0.01                            |
| B99          | 30-35                          | BC            | No                          | -                           | c.2077 G>A           | Asp693Asn  | rs4986850  | N                                           | 0.03                             |
| B100         | 35-40                          | BC            | No                          | -                           | c.2077 G>A           | Asp693Asn  | rs4986850  | N                                           | 0.03                             |
| B101         | 35-40                          | BC            | No                          | BC                          | c.2077 G>A           | Asp693Asn  | rs4986850  | N                                           | 0.03                             |
| B105         | 45-50                          | BC/OC         | Yes                         | OC                          | c.4117 G<T           | Glu1373Ter | rs80357259 | D                                           | >0.01                            |
| B111         | 40-45                          | OC            | Yes                         | -                           | c.181 T>G            | Cys61Gly   | rs28897672 | D                                           | >0.01                            |
| BM2          | 35-40                          | BC/Lym        | Yes                         | -                           | c.3119 G>A           | Ser1040Asn | rs4986852  | N                                           | 0.01                             |
| BM16         | 50-55                          | BC            | Yes                         | BC                          | c.1067A>G            | Gln356Arg  | rs1799950  | N                                           | 0.02                             |
| BM25         | 50-55                          | BC            | Yes                         | -                           | c.3119 G>A           | Ser1040Asn | rs4986852  | N                                           | 0.01                             |

<sup>a</sup>Expected clinical significance based on the ClinVar-NCBI database. <sup>b</sup>Data based on Ensembl genome browser 91. D, deleterious; N, most likely neutral; BC, breast cancer; OC, ovarian cancer; PC, pancreatic cancer; Lym, lymphoma.
